# Supplementary material for: Modified Protein-Water Interactions in CHARMM36m for Thermodynamics and Kinetics of Proteins in Dilute and Crowded Solutions
Source: MDPI journal article supplement (doi:10.3390/molecules27175726), 2022-09-05
Supplement: s1 [file s1]

# **Supporting Information for**

## **Modified Protein–Water Interactions in CHARMM36m for Thermodynamics and Kinetics of Proteins in Dilute and Crowded Solutions**

Daiki Matsubara<sup>1</sup>, Kento Kasahara<sup>1,2</sup>, Hisham Dokainish<sup>3</sup>, Hiraku Oshima<sup>1</sup>, and Yuji Sugita<sup>1,3,4,\*</sup>

<sup>1</sup>Laboratory for Biomolecular Function Simulation, RIKEN Center for Biosystems Dynamics Research, Kobe, Hyogo, Japan.

<sup>2</sup>Division of Chemical Engineering, Graduate School of Engineering Science, Osaka University, Toyonaka, Osaka, Japan.

<sup>3</sup>Theoretical Molecular Science Laboratory, RIKEN Cluster for Pioneering Research, Saitama, Japan.

<sup>4</sup>Computational Biophysics Research Team, RIKEN Center for Computational Science, Kobe, Hyogo, Japan.

\*To whom correspondence may be addressed. Email: Yuji Sugita ([sugita@riken.jp](mailto:sugita@riken.jp))

### Scheme of computing diffusion coefficients of villin

It is known that the diffusion coefficient has a system size dependency, which arises from the artifacts of the periodic boundary condition (PBC). The expression of the corrected diffusion coefficient was proposed by Yeh and Hummer [1] as

|                                                                                               |     |
|-----------------------------------------------------------------------------------------------|-----|
| $D = D_{\text{MSD}} + \frac{k_B T}{6\pi\eta L} \left( \xi - \frac{4\pi R_h^2}{3L^2} \right),$ | (1) |
|-----------------------------------------------------------------------------------------------|-----|

with  $\xi = 2.837$ . Here,  $D_{\text{MSD}}$  is the diffusion coefficient evaluated from the slope of the mean square displacement (MSD) as

|                                                                            |     |
|----------------------------------------------------------------------------|-----|
| $D_{\text{MSD}} = \lim_{t \rightarrow \infty} \frac{1}{6t} \text{MSD}(t).$ | (2) |
|----------------------------------------------------------------------------|-----|

$k_B, T, L, \eta$ , and  $R_h$  are the Boltzmann constant, absolute temperature, box length of the system, solvent viscosity, and hydrodynamic radius of villin, respectively. Let us define the second term of Eq. (1) as  $D_{\text{PBC}}$ . The value of  $R_h$  is taken from the HYDROPRO [2] estimation as 13.86 Å reported in the previous study [3]. The viscosity of the TIP3P water,  $\eta_{\text{TIP3P}} = 0.35$  cP [4], is used for the dilute solution, while the viscosity of the crowder solution is estimated as

|                                              |     |
|----------------------------------------------|-----|
| $\eta_c = \eta_{\text{TIP3P}}(1 + 2.5\phi),$ | (3) |
|----------------------------------------------|-----|

where  $\phi$  is the volume fraction of the crowders determined from  $R_h$ . The TIP3P water model is known to underestimate the water viscosity ( $\eta_{\text{expt}} = 0.89$  cP [5]), leading to the overestimation of the diffusion coefficient. According to the previous study [3], the viscosity correction described as

|                                                          |     |
|----------------------------------------------------------|-----|
| $D' = D \frac{\eta_{\text{TIP3P}}}{\eta_{\text{expt}}},$ | (4) |
|----------------------------------------------------------|-----|

is employed.

### References

1. Yeh, I.-C.; Hummer, G. System-Size Dependence of Diffusion Coefficients and Viscosities from Molecular Dynamics Simulations with Periodic Boundary Conditions. *J. Phys. Chem. B* **2004**, *108*, 15873–15879,

doi:10.1021/jp0477147.

2. Ortega, A.; Amorós, D.; García de la Torre, J. Prediction of Hydrodynamic and Other Solution Properties of Rigid Proteins from Atomic- and Residue-Level Models. *Biophys. J.* **2011**, *101*, 892–898, doi:10.1016/j.bpj.2011.06.046.
3. Nawrocki, G.; Wang, P.; Yu, I.; Sugita, Y.; Feig, M. Slow-Down in Diffusion in Crowded Protein Solutions Correlates with Transient Cluster Formation. *J. Phys. Chem. B* **2017**, *121*, 11072–11084, doi:10.1021/acs.jpcc.7b08785.
4. Feller, S.E.; Pastor, R.W.; Rojnuckarin, A.; Bogusz, S.; Brooks, B.R. Effect of Electrostatic Force Truncation on Interfacial and Transport Properties of Water. *J. Phys. Chem.* **1996**, *100*, 17011–17020, doi:10.1021/jp9614658.
5. Korson, L.; Drost-Hansen, W.; Millero, F.J. Viscosity of Water at Various Temperatures. *J. Phys. Chem.* **1969**, *73*, 34–39, doi:10.1021/j100721a006.

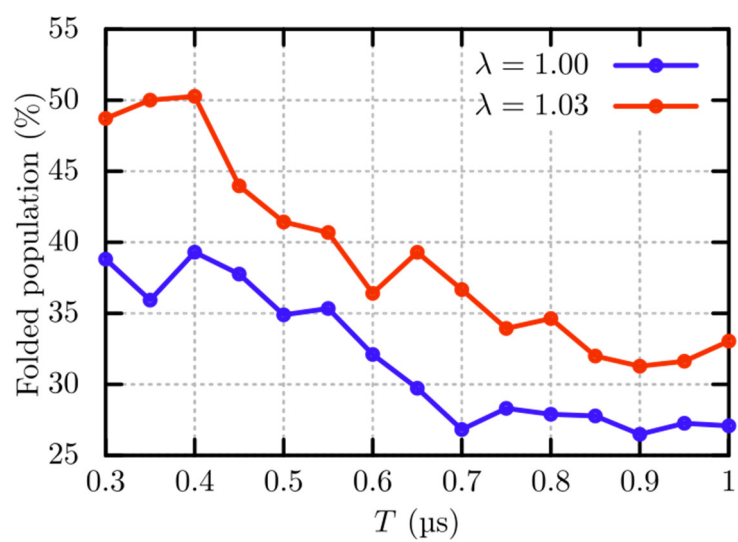

**Supplementary Figure S1:** Convergence of the folded population for chignolin using different trajectory length,  $T$ .

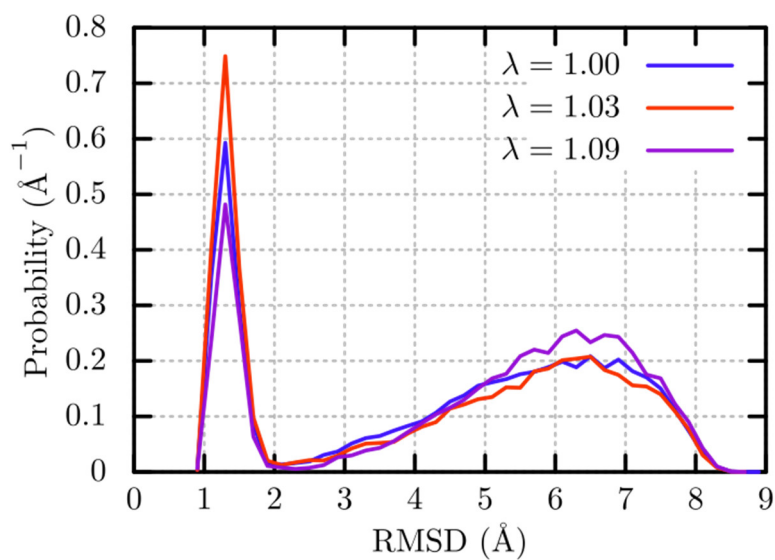

**Supplementary Figure S2:** Probability densities along the Ca-RMSD of chignolin for different values of  $\lambda$  obtained from GaREUS simulations. The profiles for  $\lambda = 1.00$  and  $\lambda = 1.03$  are computed using the 1-ms simulations, while that for  $\lambda = 1.09$  is using the 0.425-ms simulation. The folded population for  $\lambda = 1.09$  is 22%.

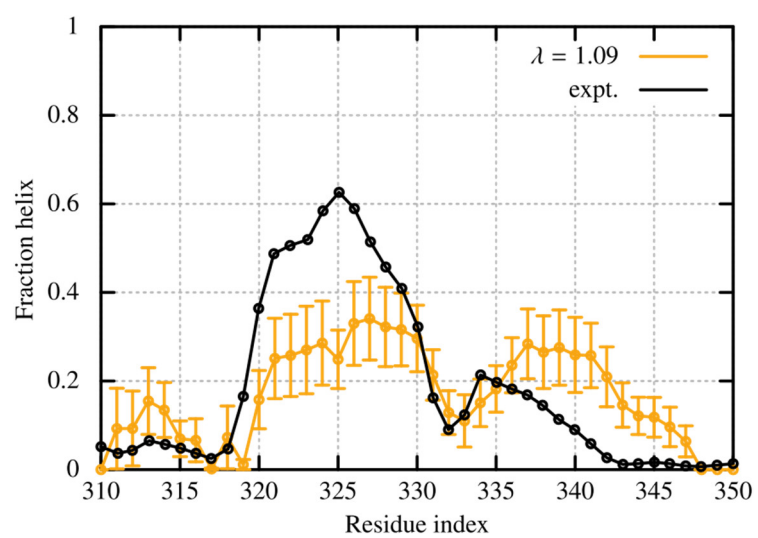

**Supplementary Figure S3:** Fraction of helix in the C-terminal domain of TDP-43 for  $l=1.09$ . The helicity is evaluated through the DSSP algorithm.

(a)  $\lambda = 1.00$

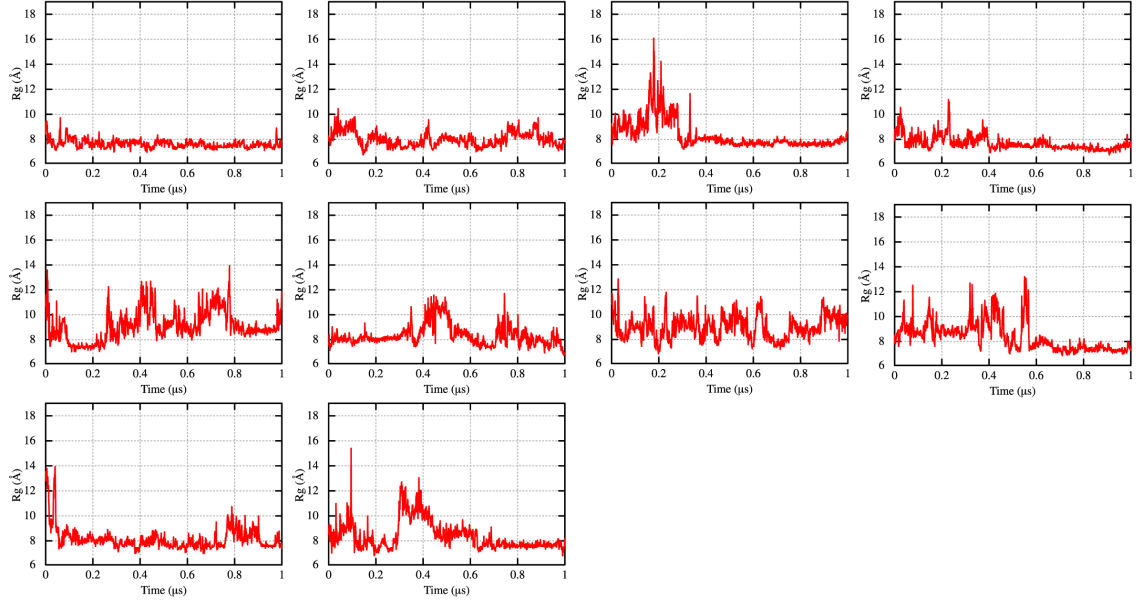

(b)  $\lambda = 1.03$

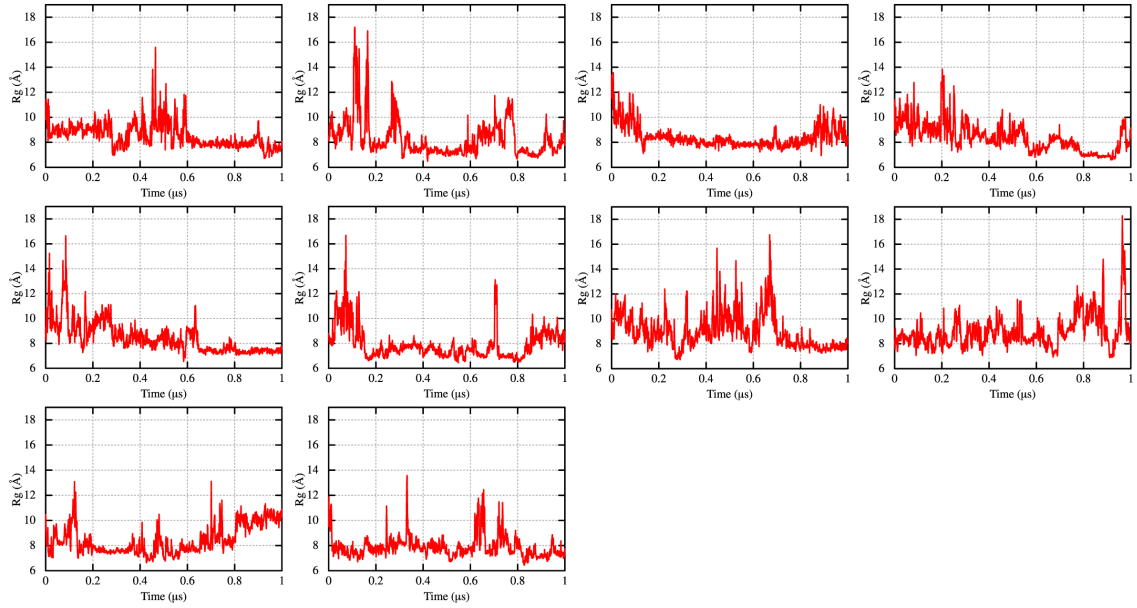

**Supplementary Figure S4:** The radius of gyration,  $R_g$ , of TDP-43. Each plot is obtained from ten independent GaMD simulations for  $\lambda = 1.00$  (a) and 1.03 (b).

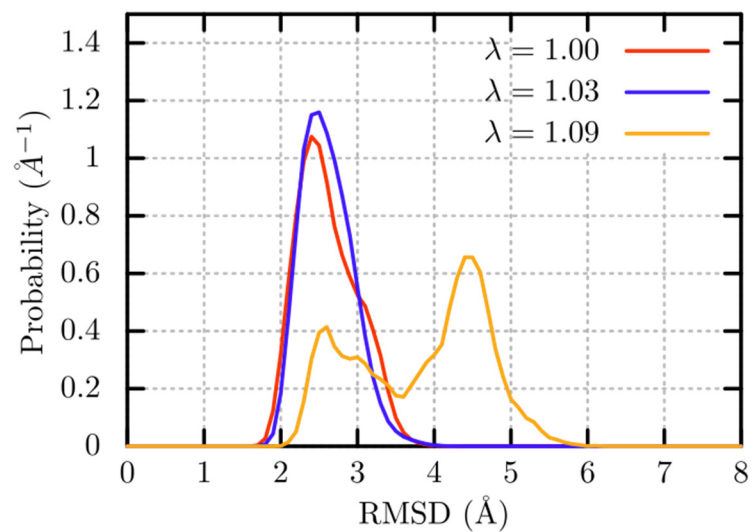

**Supplementary Figure S5:** Distribution of Ca-RMSD for c-Src kinase. The terminal residues are excluded for the analysis. The profiles are calculated from five independent trajectories for  $\lambda = 1.00$  and  $\lambda = 1.03$ , and from one trajectory for  $\lambda = 1.09$ .



(a)  $\lambda = 1.00$

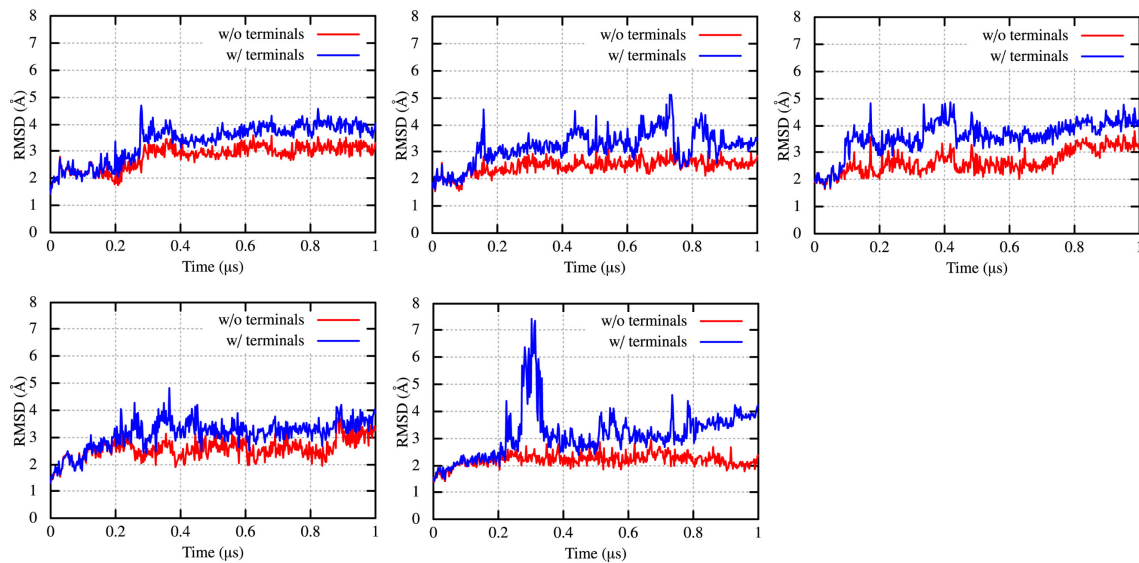

(b)  $\lambda = 1.03$

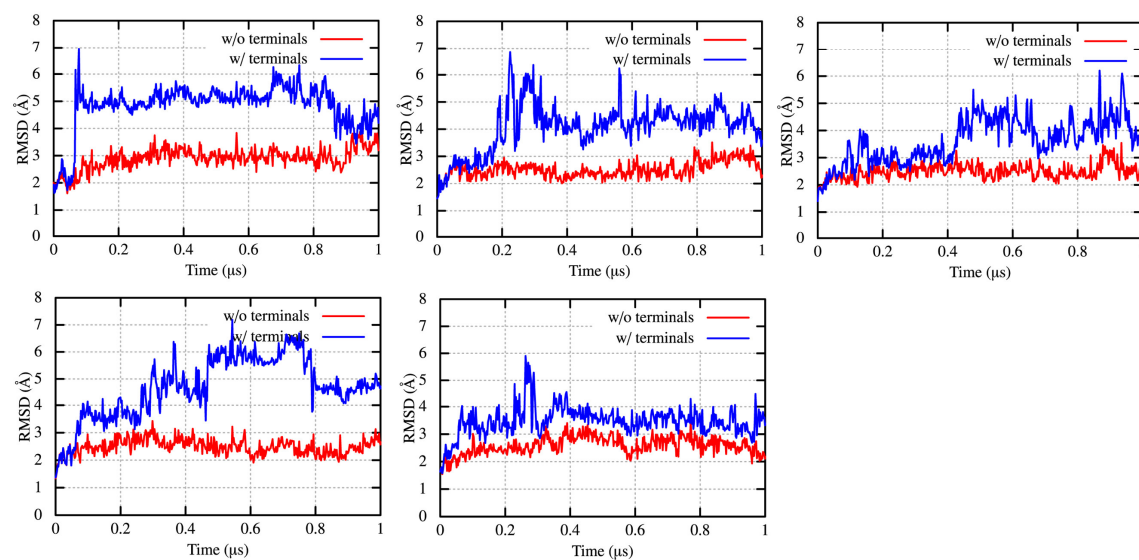

**Supplementary Figure S6:** The  $C\alpha$ -RMSD of c-Src kinase in dilute solution. Each plot is obtained from five independent simulations for  $\lambda = 1.00$  (a) and 1.03 (b). Blue and red lines show the  $C\alpha$ -RMSD with and without 10 terminal residues.

(a)  $\lambda = 1.00$

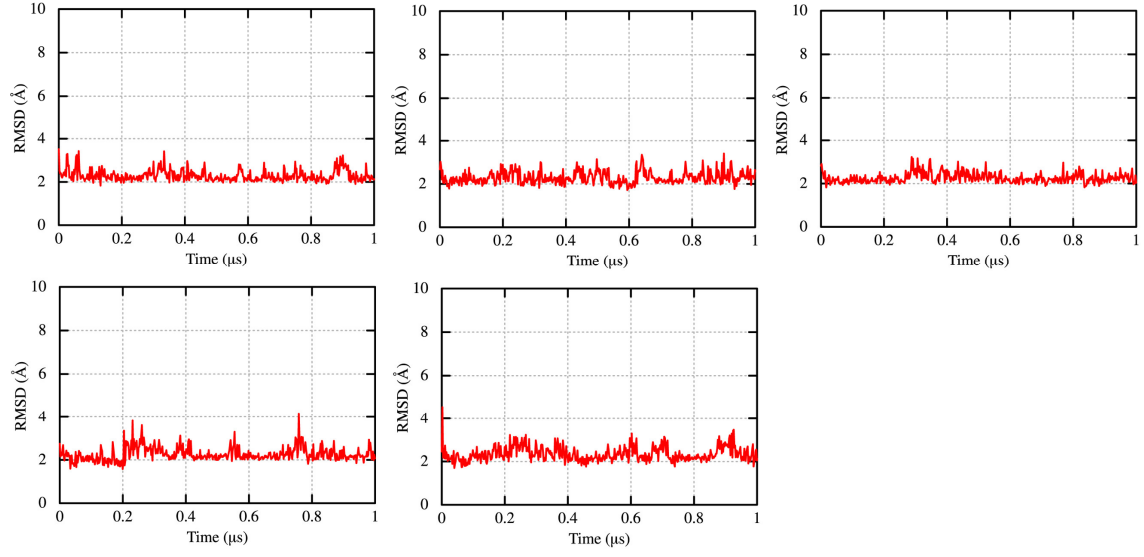

(b)  $\lambda = 1.03$

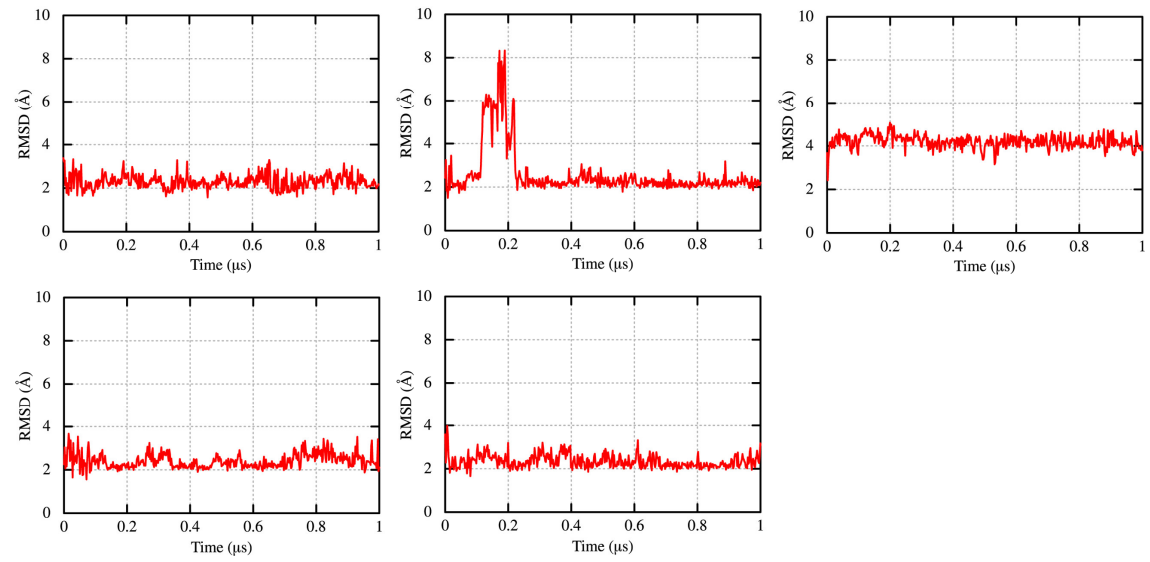

**Supplementary Figure S7:** The C $\alpha$ -RMSD of villin in dilute solution. Each plot is obtained from five independent MD simulations for  $\lambda = 1.00$  (a) and 1.03 (b).

(a)  $\lambda = 1.00$

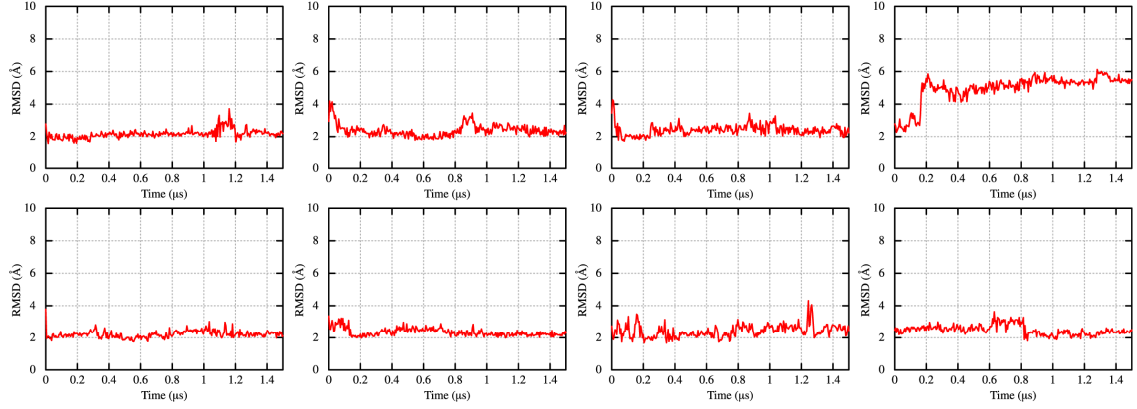

(b)  $\lambda = 1.03$

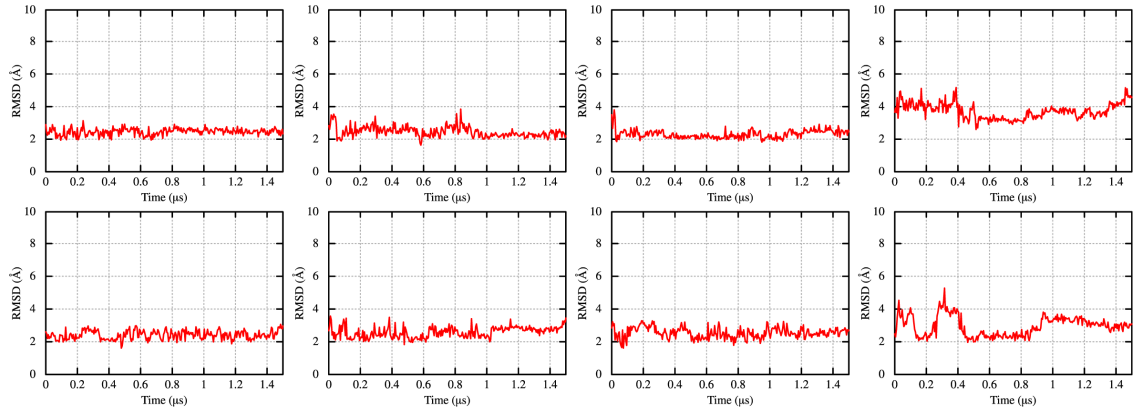

**Supplementary Figure S8:** The C $\alpha$ -RMSD of villins in crowded solutions.  $\lambda = 1.00$  (a) and 1.03 (b). In each simulation system, eight villins are included and the C $\alpha$ -RMSD is calculated for the individual protein.

(a) Dilute ( $\lambda = 1.09$ )

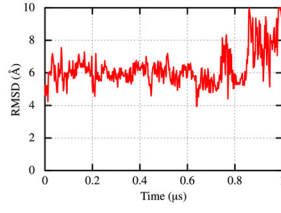

(b) Crowded ( $\lambda = 1.09$ )

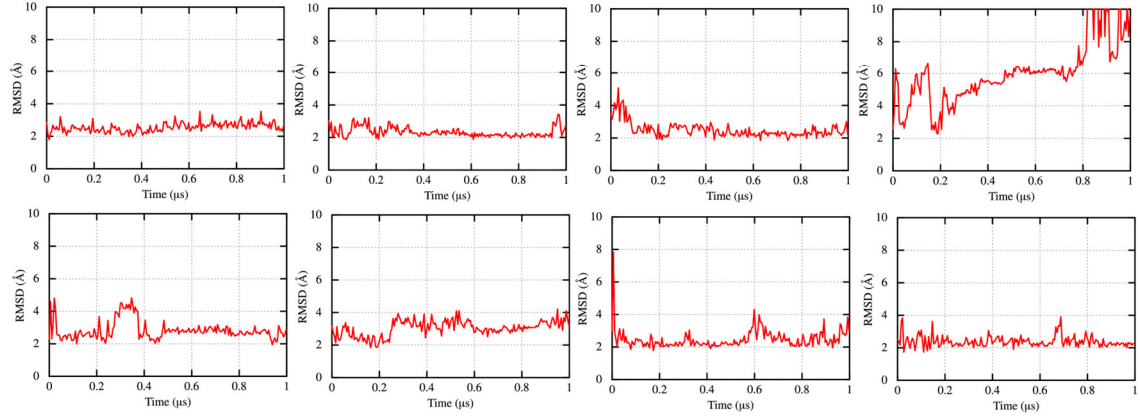

**Supplementary Figure S9:** The C $\alpha$ -RMSD of villins for  $\lambda = 1.09$  in the dilute (a) and crowded solutions (b). In the crowded solution, eight villins are included and the C $\alpha$ -RMSD is calculated for the individual protein.

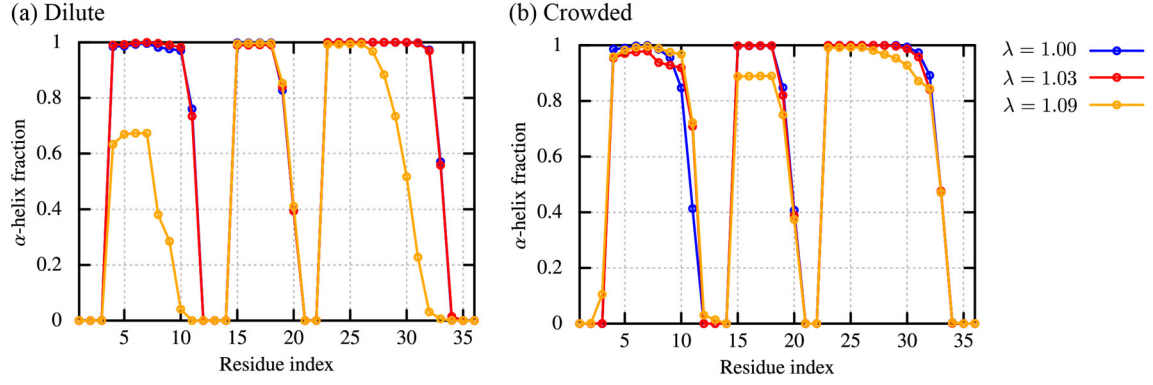

**Supplementary Figure S10:** The  $\alpha$ -helix fraction of villin in the dilute (a) and crowded solutions (b). The fraction is computed using DSSP algorithm. In the case of the dilute solution, the fractions for  $\lambda = 1.00$  and 1.03 are averages of the five independent trajectories, while that for  $\lambda = 1.09$  is computed from one trajectory. As for the crowded solution, the averages of the fraction over eight villins are shown for all the conditions.
